# Supplementary material for: Dichotomous intronic polyadenylation profiles reveal multifaceted gene functions in the pan-cancer transcriptome
Source: PubMed Central journal article supplement (PMC11541570; doi:10.1038/s12276-024-01289-w), 2024-10-01
Supplement: 12276_2024_1289_MOESM1_ESM.pdf [file 12276_2024_1289_MOESM1_ESM.pdf]

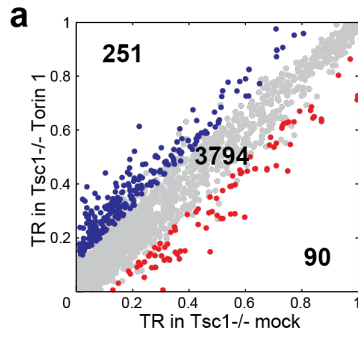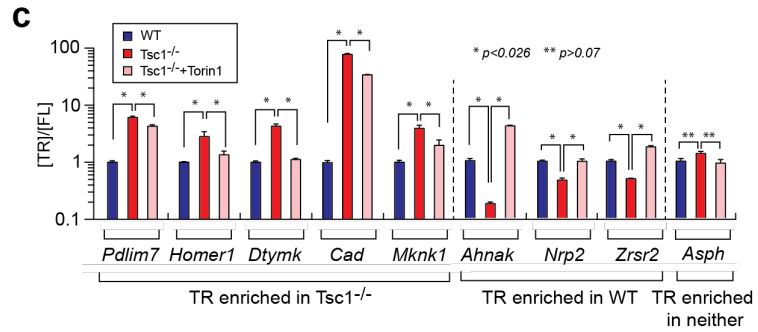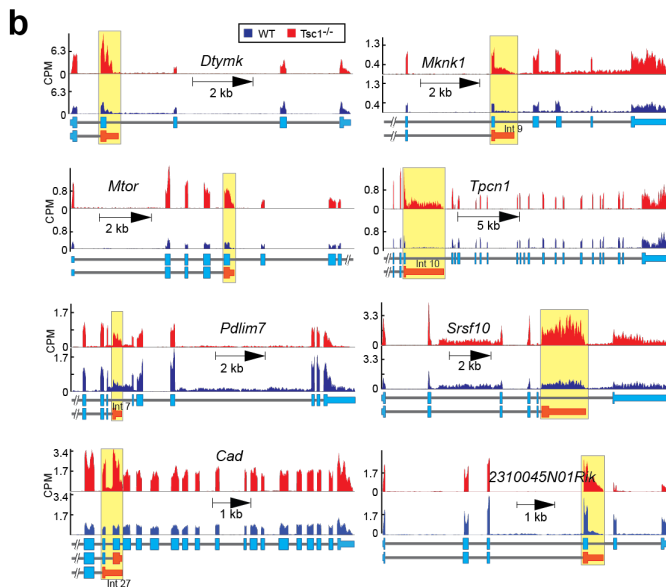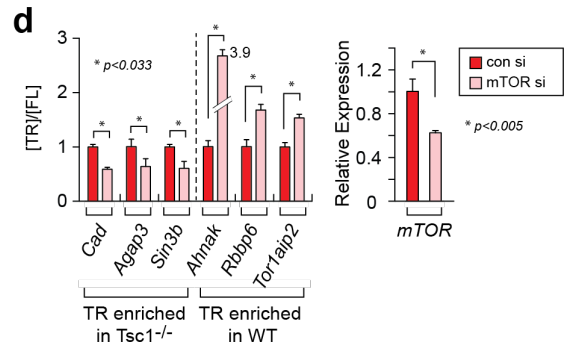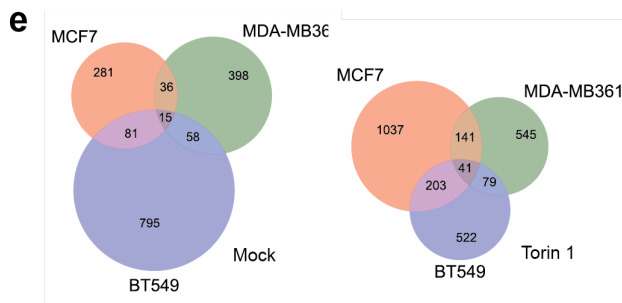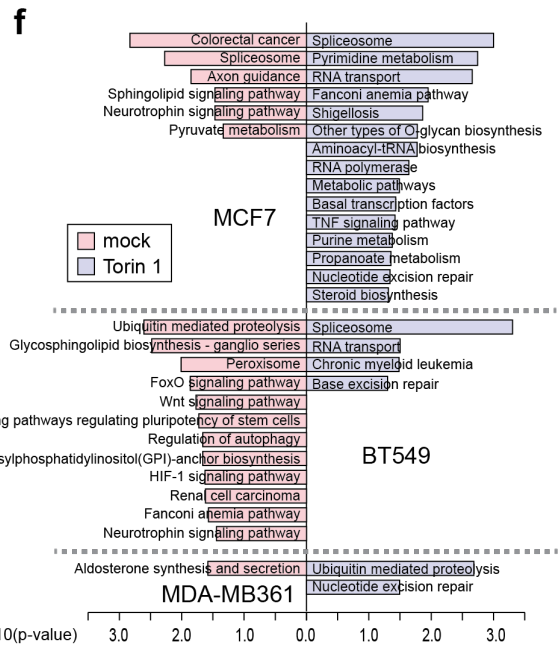

**g**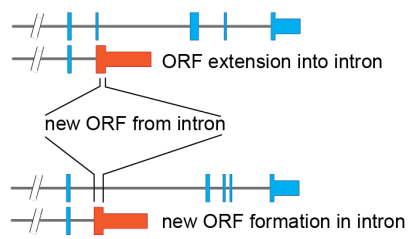**h**

### SRM workflow to identify C-terminal peptides from truncated proteins

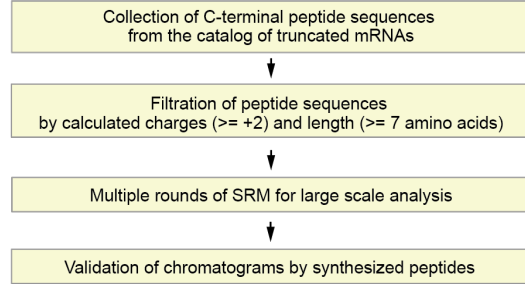**i**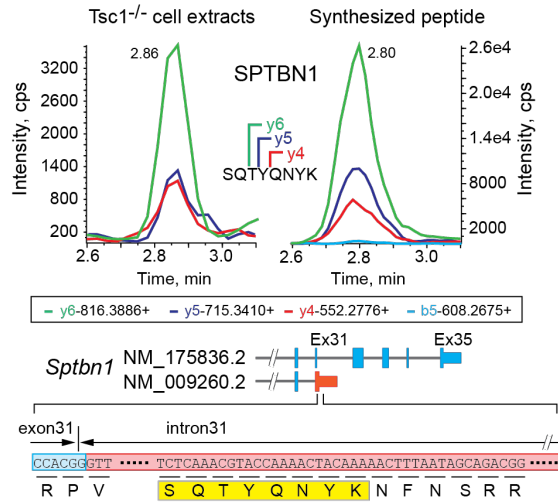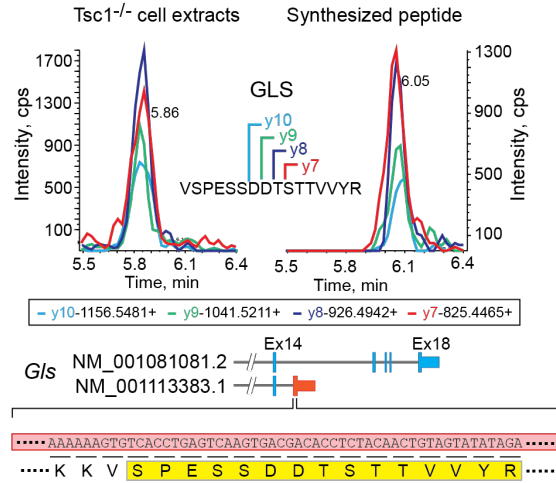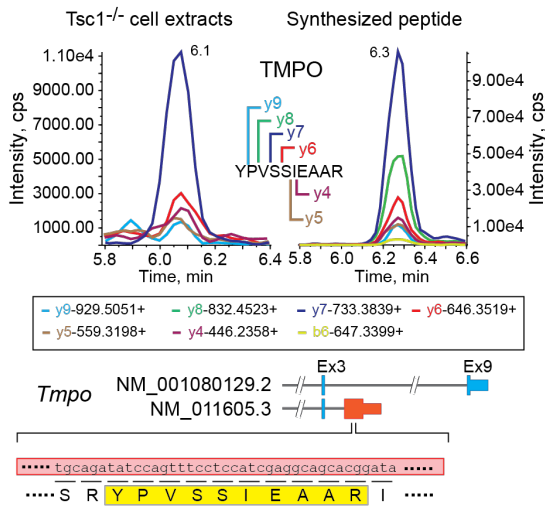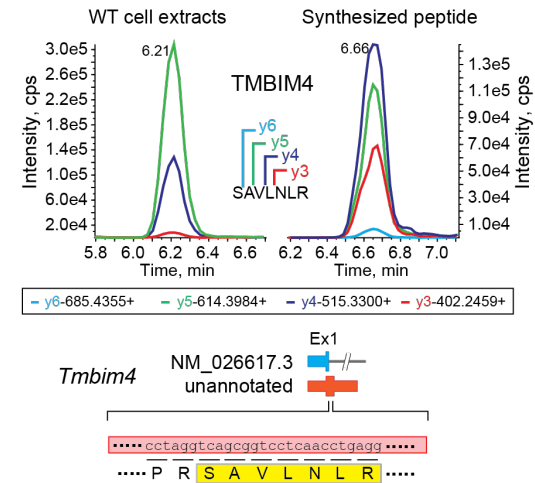

**Supplementary Figure 1. a** Scatter plots for TR of genes in low and high mTOR in *Tsc1*<sup>-/-</sup> MEFs. *Tsc1*<sup>-/-</sup> + mock (high mTOR) vs *Tsc1*<sup>-/-</sup> + Torin 1 (100 nM, 24 hours; low mTOR) were compared.

**b** Additional examples of RNA-Seq read alignments for genes showing enriched intronic APA events in high mTOR *Tsc1*<sup>-/-</sup> MEFs. The alignments were color-coded as indicated in the figure. The yellow box highlights the regions with the intronic APA event. **c** and **d** Real-time quantitative PCR (RT-qPCR) validation of genes showing dynamic intronic APA events upon the changes of mTOR signaling in cells. RNAi knockdown of mTOR kinase was conducted using *Tsc1*<sup>-/-</sup> MEFs and the changes of TR for selected genes were tested for intronic APA events. The selection of genes was based on the enriched intronic APA events in *Tsc1*<sup>-/-</sup> or WT MEFs. The Y-axis scale is shown in the log scale. Four technical repeats were conducted, and students' t-tests were performed for statistical analysis. The data are presented as the mean (SD). **e** Overlap of intronic APA genes across the investigated breast cancer cell lines. Overlapping intronic APA events among three breast cancer cell lines with mock or Torin 1 treatment were analyzed. **f** Enriched KEGG pathways by intronic APA events in three breast cancer cell lines. Enrichment was analyzed by the comparison between mock and Torin 1 treated cells. **g** A schematic presentation of intronic APA and the formation of new ORFs based on intron regions. **h** A SRM workflow for the identification of new peptide sequences from intron regions. **i** Peptide sequences that are produced from intron regions due to intronic APA. Peptides were identified and verified by SRM.

**a**

|      | Tumor | Normal |
|------|-------|--------|
| BRCA | 1061  | 109    |
| COAD | 400   | 32     |
| KIRC | 361   | 68     |
| LIHC | 365   | 50     |
| STAD | 362   | 26     |
| LUAD | 506   | 56     |
| LUSC | 469   | 45     |
| PRAD | 492   | 51     |
| HNSC | 520   | 44     |
| THCA | 486   | 57     |

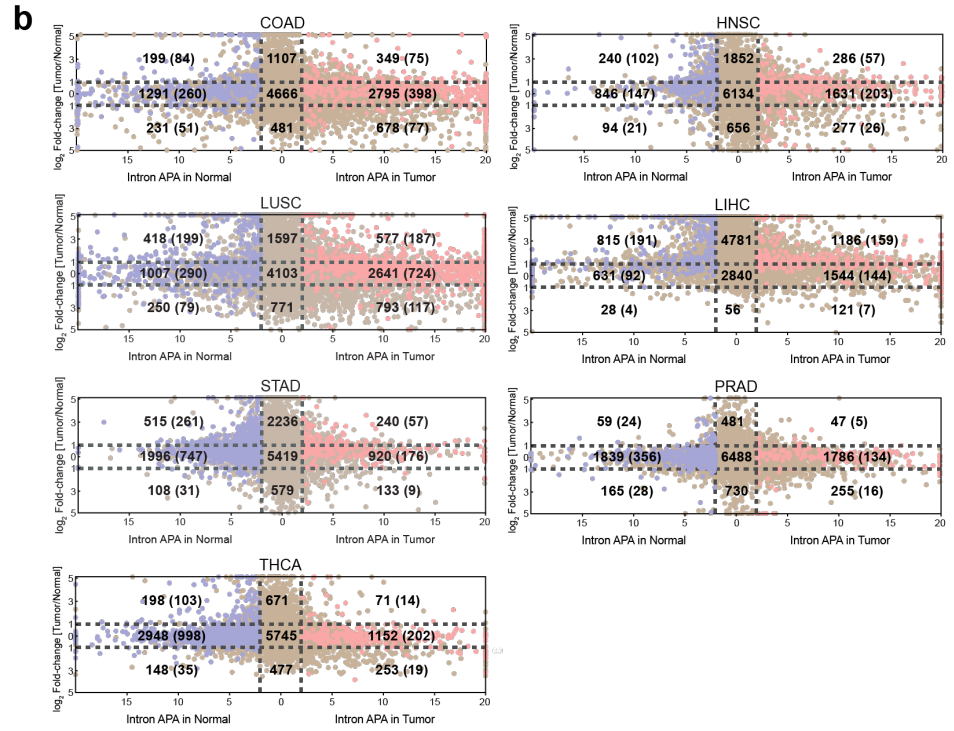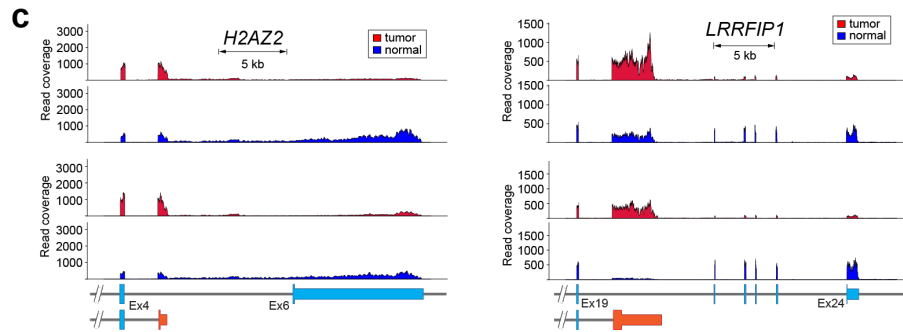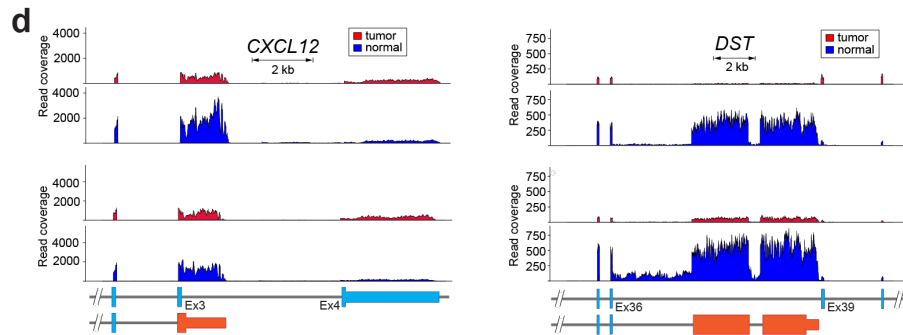

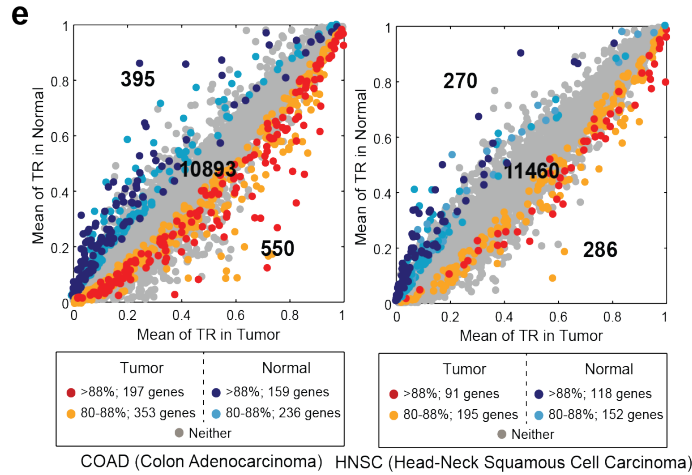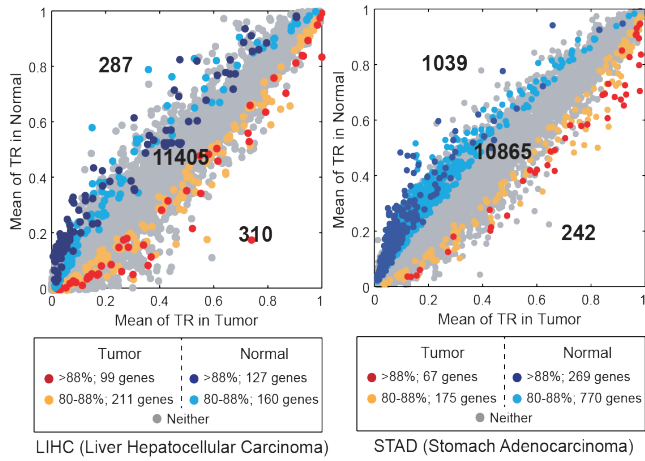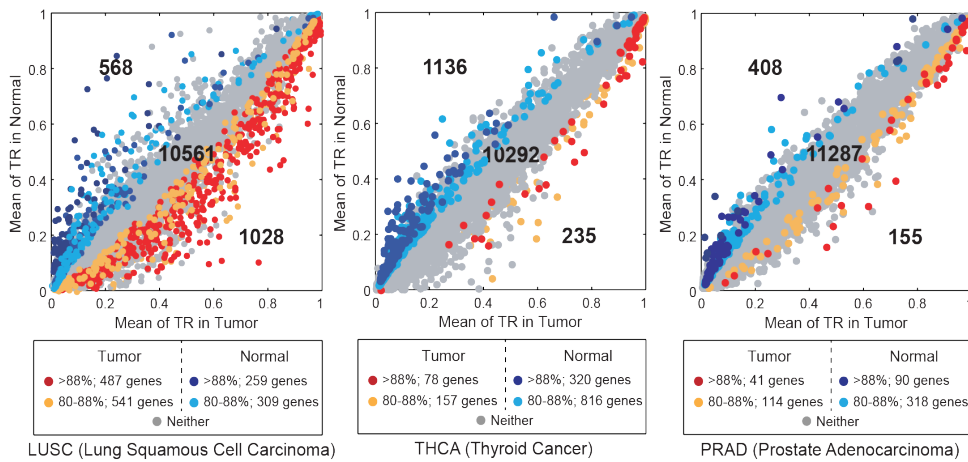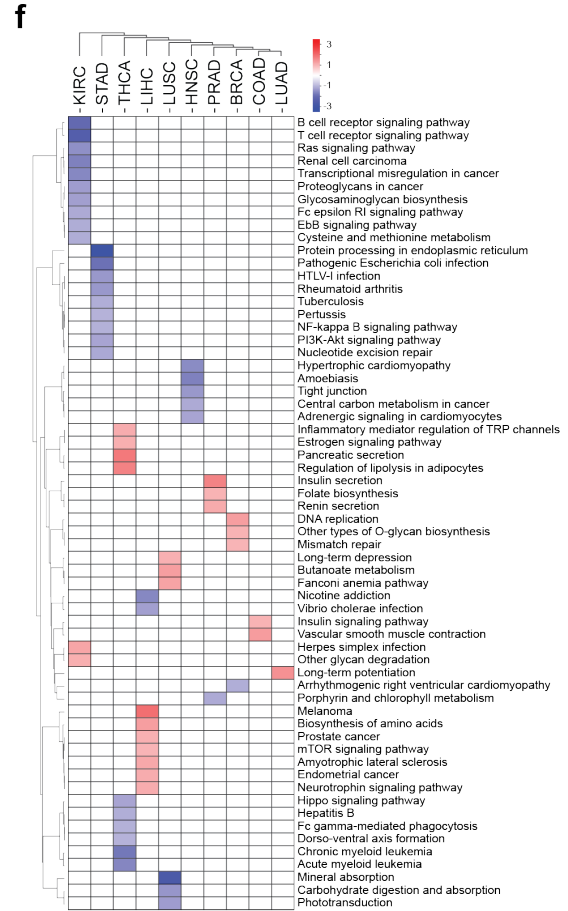

**Supplementary Figure 2. a** Collection of tumor samples and normal tissues from 10 types of cancer in the TCGA data. **b** Differential expression analyses for genes with annotated intronic APA events in normal tissues and tumor samples. TCGA-COAD (Colon Adenocarcinoma), TCGA-HNSC (Head and Neck Squamous Cell Carcinomas), TCGA-LUSC (Lung Squamous Cell Carcinoma), TCGA-LIHC (Liver Hepatocellular Carcinoma), TCGA-STAD (Stomach adenocarcinoma), TCGA-PRAD (Prostate Adenocarcinoma), and TCGA-THCA (Thyroid carcinoma) data analyses are shown. The x-axis presents the significance of intronic APA events calculated by  $-\log_{10}(p\text{-value})$ .  $p$ -values were determined by students' t-test. The y-axis shows the fold changes of gene expression in tumors over normal samples. Red dots indicate the genes showing significant intronic APA events conserved in 80% or more of tumor samples (i.e., 80% or more of tumor samples have higher TRs than the mean TR of normal tissue samples). Blue dots indicate the genes showing significant APA events that 80% or more of tumor samples have lower TRs than the mean TR of normal tissue samples. **c** Exemplary RNA-Seq read alignments from BRCA data for *H2AZ2* and *LRRFIP1* genes. **d** Exemplary RNA-Seq read alignments from BRCA data for *CXCL12* and *DST* genes. **e** Scatter plots for intronic APA events in COAD, HNSC, LUSC, LIHC, STAD, PRAD, and THCA. The TR mean for genes with significant intronic APA events is color-coded. Genes showing intronic APA events in more than 88% of samples are color-coded as blue (normal) or red (tumor). Genes with intronic APA events in 80-88% of samples are shown in cyan (normal) or orange (tumor). **f** A heatmap for the KEGG pathways that are enriched by intronic APA events. The KEGG pathways that are unique to each cancer type are displayed. The color scale represents  $-\log_{10}(p\text{-value})$  for pathways enriched in tumor and  $\log_{10}(p\text{-value})$  for pathways enriched in normal: red-colored KEGG pathways are enriched in tumor samples and blue-colored KEGG pathways are enriched in normal tissues.

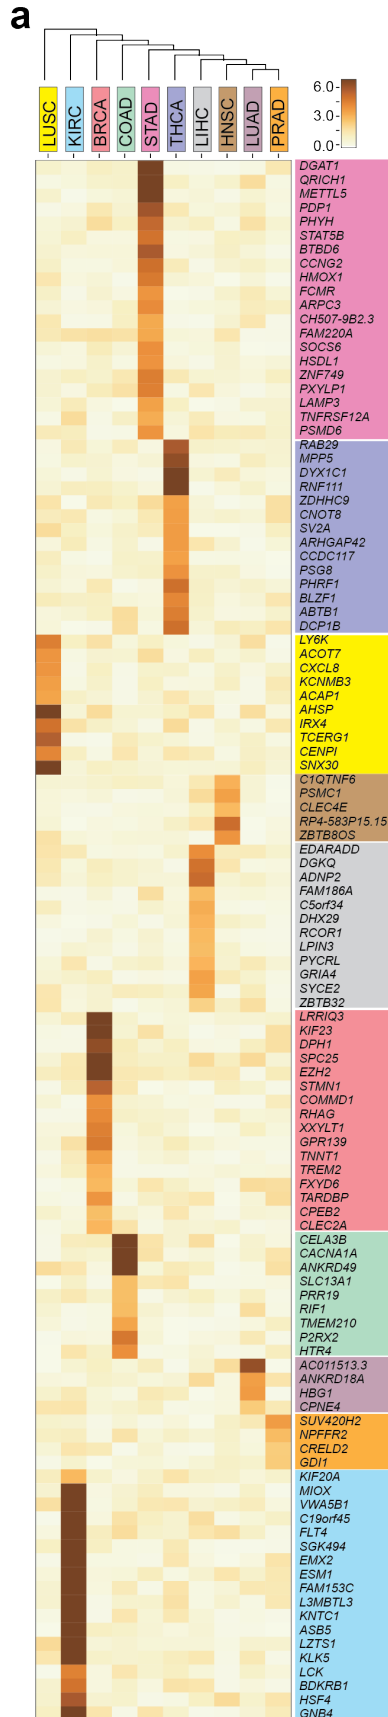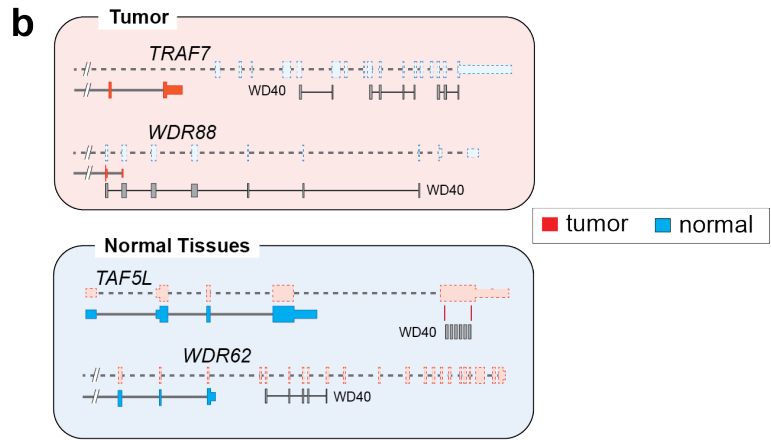

**Supplementary Figure 3. a** Examples of intronic APA events that are unique to each cancer type.

**b** Schematic presentation of Pfam domain swapping in tumors and normal tissues by intronic APA events. The WD-40 domain containing proteins are shown as an example.



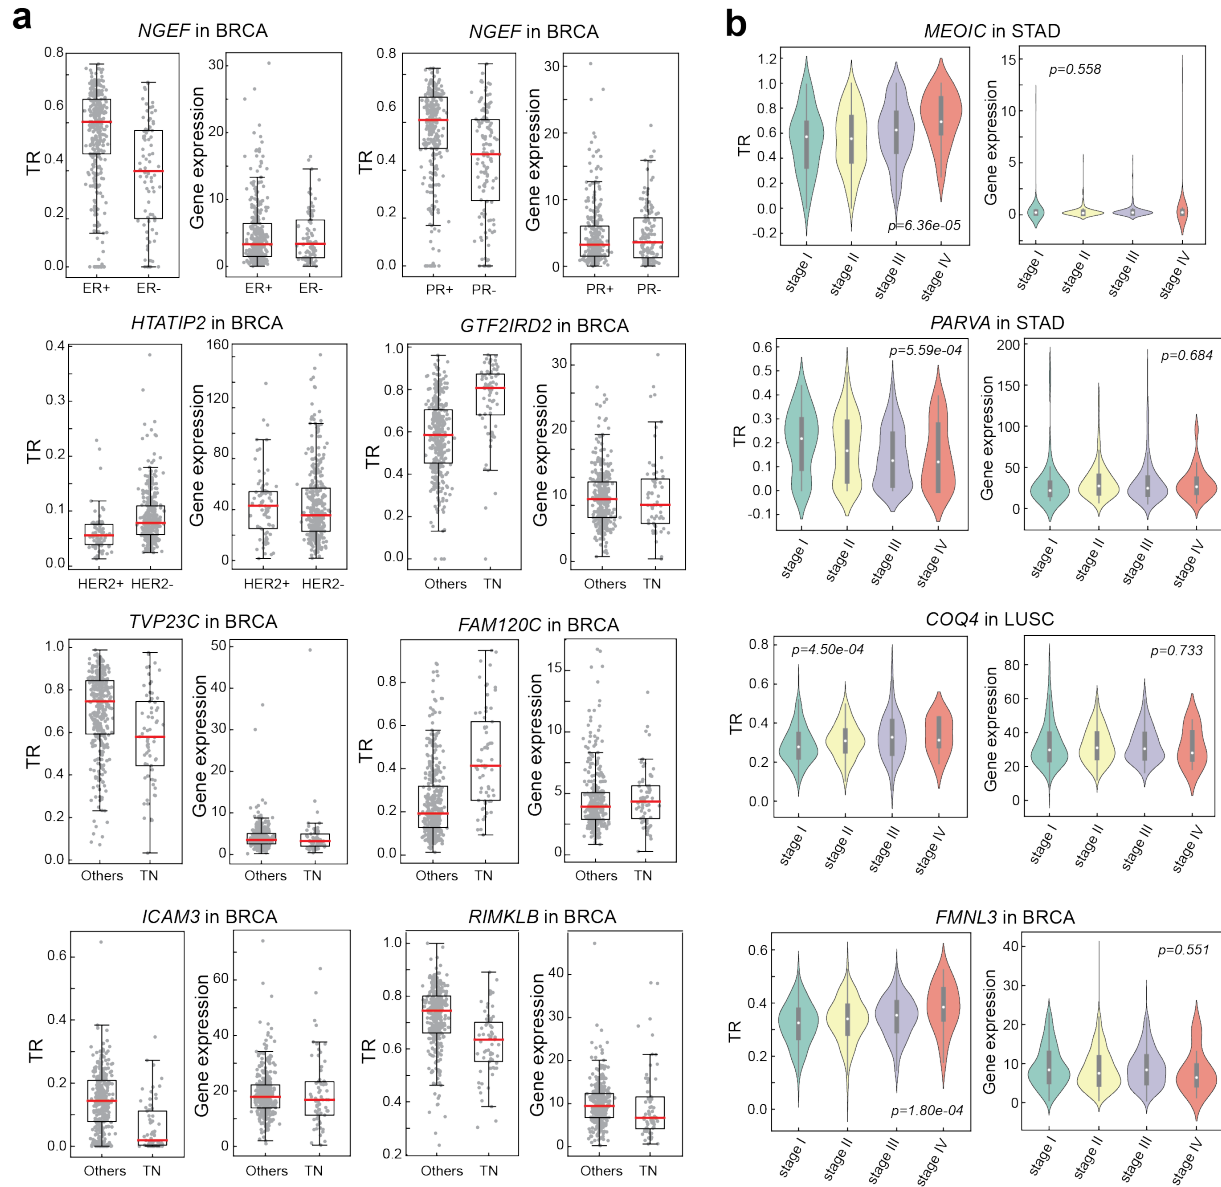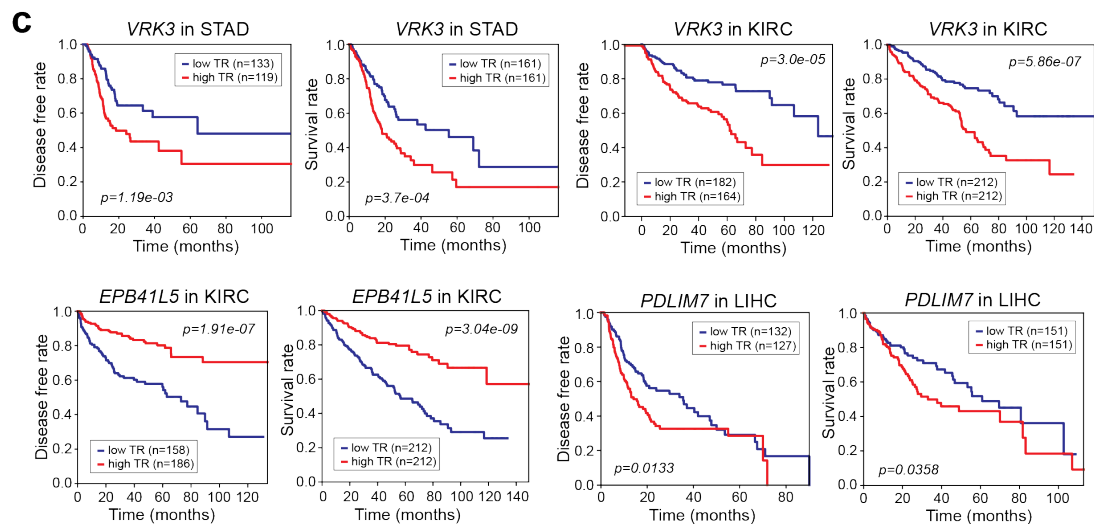

**Supplementary Figure 4. a** The boxplots show four examples that intronic APA events are correlated with hormone receptor phenotypes but not the corresponding gene expression levels in BRCA data. The *p*-values were determined by unpaired t-test. *NGEF* TR  $p=1.25e-10$ , Gene expression (GE)  $p=0.603$ ; *NGEF* TR  $p=6.60e-8$ , Gene expression (GE)  $p=0.747$ ; *HTATIP2* TR  $p=1.95e-6$ , GE  $p=0.964$ ; *GTF2IRD2* TR  $p=6.90e-12$ , GE  $p=0.540$ ; *TVP23C* TR  $p=3.61e-6$ , GE  $p=0.721$ ; *FAM120C* TR  $p=2.09e-15$ , GE  $p=0.536$ ; *ICAM3* TR  $p=9.46e-11$ , GE  $p=0.802$ ; *RIMKLB* TR  $p=3.36e-10$ , GE  $p=0.640$ . **b** Violin plots illustrate multiple exemplary genes demonstrating significant intronic APA events but not significant differential gene expression in cancer stages. **c** Kaplan-Meier (KM) plots illustrate the correlation between the TR of selected genes (*VRK3*, *EPB41L5* and *PDLIM7*) and the disease-free rate or survival rate of cancer patients in STAD, LIHC and KIRC.

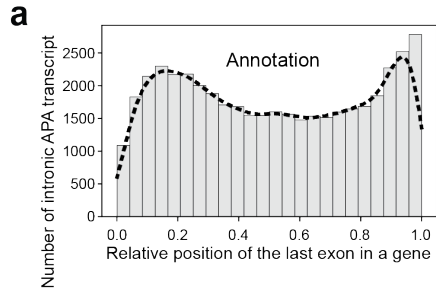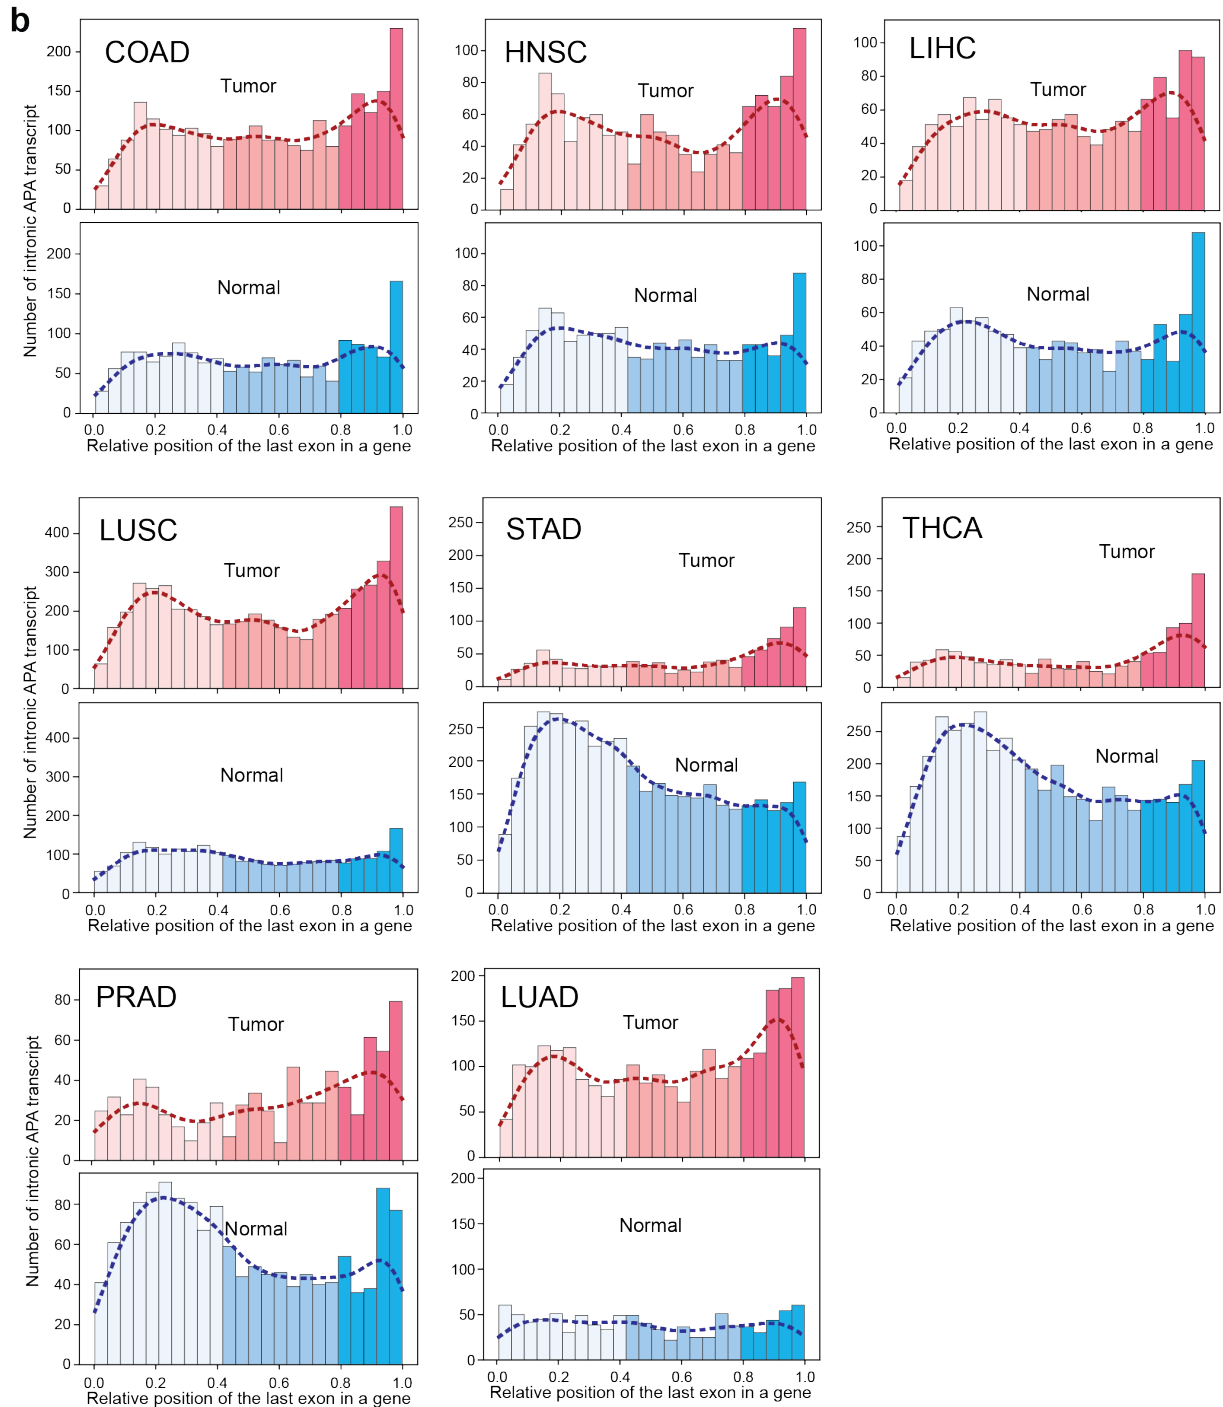

**Supplementary Figure 5. a** The distribution of relative positions of the 3'-last exon of intronic APA transcripts. The graph was generated using all annotated intronic APA transcripts and their corresponding full-length transcripts registered in the current genome annotation. **b** Histogram displays for the distribution of intronic APA position in pan-cancer data.
